# Supplementary material for: 2-Amino-3-Methylimidazo[4,5-f]quinoline Triggering Liver Damage by Inhibiting Autophagy and Inducing Endoplasmic Reticulum Stress in Zebrafish (Danio rerio)
Source: MDPI journal article supplement (doi:10.3390/toxins13110826), 2021-11-22
Supplement: s1 [file s1]

Supplementary Information

## 2-Amino-3-methylimidazo[4,5-f]quinoline Triggering Liver Damage by Inhibiting Autophagy and Inducing Endoplasmic Reticulum Stress in Zebrafish (*Danio rerio*)

Dan Li <sup>1</sup>, Zhi Li <sup>1</sup>, Tianchang Zhang <sup>1</sup>, Bo Peng <sup>1</sup>, Yan Zhang <sup>1,\*</sup>, Hongwen Sun <sup>2</sup> and Shuo Wang <sup>1,\*</sup>

<sup>1</sup> Tianjin Key Laboratory of Food Science and Health, School of Medicine, Nankai University, Tianjin 300071, China; lidan@mail.nankai.edu.cn (D.L.); lizhi3204@126.com (Z.L.); tczhang@mail.nankai.edu.cn (T.Z.); iq1226jsnpb@hotmail.com (B.P.)

<sup>2</sup> Ministry of Education Key Laboratory of Pollution Processes and Environmental Criteria, College of Environmental Science and Engineering, Nankai University, Tianjin 300071, China; sunhongwen@nankai.edu.cn

\* Correspondence: yzhang@nankai.edu.cn (Y.Z.); wangshuo@nankai.edu.cn (S.W.)

**Table S1.** Primer sequences for qPCR used in this study.

| Symbol           | Forward Primer (5'-3')   | Reverse Primer (5'-3')   |
|------------------|--------------------------|--------------------------|
| <i>bax</i>       | GGCTATTTCAACCAGGGTTCC    | TGCGAATCACCAATGCTGT      |
| <i>caspase-3</i> | CCGCTGCCCATCACTA         | ATCCTTTCACGACCATCT       |
| <i>caspase-8</i> | CCAGACAATCTGGATGAACTTTAC | TGCAAACTGCTTTATCTCATCT   |
| <i>caspase-9</i> | CTGAGGCAAGCCATAATCG      | AGAGGACATGGGAATAGCGT     |
| <i>atf6</i>      | CTGTGGTGAAACCTCCACCT     | CATGGTGACCACAGGAGATG     |
| <i>ire1α</i>     | TGACGTGGTGGAAGTTGGTA     | ACGGATCACATTGGGATGTT     |
| <i>xbp1</i>      | GGGTTGGATACCTTGGA        | AGGGCCAGGGCTGTGAGTA      |
| <i>perk</i>      | TGGGCTCTGAAGAGTTCGAT     | TGTGAGCCTTCTCCGTCCTT     |
| <i>eif2α</i>     | CATTGAGGTGGCGTGTTATG     | TCGATCCGCTCTTTAATTGC     |
| <i>gadd34</i>    | TTCACCATCTCCACACCTCA     | CTGCCACAGCTTCATTTTGA     |
| <i>atf4</i>      | TTAGCGATTGCTCCGATAGC     | GCTGCGGTTTTATTCTGCTC     |
| <i>chop</i>      | AAGGAAAGTGCAGGAGCTGA     | TCACGCTCTCCACAAGAAGA     |
| <i>atg3</i>      | ACCGTCACCATGAGAATC       | AGTTCACCTCCTCCTTCC       |
| <i>atg4b</i>     | ACACCACTCAGCCAGCAG       | AAGCCAGCAGCAATAGAAGG     |
| <i>atg5</i>      | CAACTGTGGATGGGTCTG       | GAGCGTCTGGATGAATGG       |
| <i>beclin1</i>   | GCCATTGTATTGTTCAAGGTG    | CAGAAGCCAGTGTCATCC       |
| <i>atg7</i>      | AGAGTCCAGTCCGATGTC       | GAAGTAACAGCCGAGACG       |
| <i>atg12</i>     | CCAGTTCATCTCACGCTTCCTC   | TGCCGTCACCTCCGAAACAC     |
| <i>p62</i>       | TTTGGCTCTTGTAAGGATGAC    | GAGGGCTAAAGTGAGGTGTAGTGA |
| <i>foxo3a</i>    | GAGTCCAGTAGTCGCAGTG      | GCAGTTCATCCGCCATCC       |
| <i>m-tor</i>     | ATACGCATCCAGTCCATTG      | TCATTAGCCAGTAGAGTGTTT    |
| <i>lc3b</i>      | CCTCCAACCTCAACTCCAACC    | GCCGCTCTCGTCTCTTTCC      |
| <i>β-actin</i>   | AGGTCATCACCATTGGCAAT     | GATGTCCACGTCGCACTTCAT    |
